# Supplementary material
Source: PubMed Central journal article supplement (PMC6785787)
Supplement: jnm224394SupplementalData.pdf [file jnm224394SupplementalData.pdf]

Supplemental Table 1: Function and volume before and after radioembolization for the thirteen included patients. The relative change is indicated between brackets.

| Case |          | Function                            |                                 |                                     | Volume           |                 |                  |
|------|----------|-------------------------------------|---------------------------------|-------------------------------------|------------------|-----------------|------------------|
|      |          | Whole liver [%/min/m <sup>2</sup> ] | Treated [%/min/m <sup>2</sup> ] | Non-treated [%/min/m <sup>2</sup> ] | Whole liver [ml] | Treated [ml]    | Non-treated [ml] |
| 1    | Pre-RE:  | 2.2                                 | 1.4                             | 0.6                                 | 1140.1           | 646.7           | 368.4            |
|      | Post-RE: | 1.8 (-19.1%)                        | 0.9 (-35.8%)                    | 0.8 (+24.5%)                        | 1173.4 (+2.9%)   | 590.3 (-8.7%)   | 510.3 (+35.5%)   |
| 2    | Pre-RE:  | 3.0                                 | 2.4                             | 0.6                                 | 2385.3           | 1790.8          | 577.5            |
|      | Post-RE: | 2.4 (-20.7%)                        | 1.5 (-34.4%)                    | 0.8 (+29.2%)                        | 1792.4 (-24.9%)  | 1240.3 (-30.7%) | 528.0 (-8.6%)    |
| 3    | Pre-RE:  | 1.8                                 | 1.5                             | 0.2                                 | 1439.6           | 1152.6          | 258.5            |
|      | Post-RE: | 0.6 (-69.2%)                        | 0.4 (-70.7%)                    | 0.1 (-57.1%)                        | 1012.4 (-29.7%)  | 814.5 (-29.3%)  | 193.5 (-25.1%)   |
| 4    | Pre-RE:  | 8.6                                 | 6.7                             | 1.8                                 | 1683.3           | 1240.4          | 412.7            |
|      | Post-RE: | 6.0 (-29.8%)                        | 2.2 (-67.5%)                    | 3.8 (+117.4%)                       | 1728.4 (+2.7%)   | 880.7 (-29.0%)  | 826.3 (+100.2%)  |
| 5    | Pre-RE:  | 5.2                                 | 2.4                             | 2.6                                 | 1335.7           | 721.0           | 563.1            |
|      | Post-RE: | 2.3 (-56.4%)                        | 0.6 (-73.3%)                    | 1.5 (-41.9%)                        | 2041.2 (+52.8%)  | 562.9 (-21.9%)  | 1278.4 (+127.0%) |
| 6    | Pre-RE:  | 4.5                                 | 2.4                             | 1.4                                 | 3112.5           | 1118.7          | 577.2            |
|      | Post-RE: | 5.7 (+26.2%)                        | 2.2 (-5.6%)                     | 2.8 (+98.4%)                        | 3161.2 (+1.6%)   | 870.7 (-22.2%)  | 819.8 (+42.0%)   |
| 7    | Pre-RE:  | 6.3                                 | 4.0                             | 2.1                                 | 2646.7           | 1746.5          | 825.0            |
|      | Post-RE: | 5.1 (-17.9%)                        | 2.3 (-42.5%)                    | 2.8 (+30.8%)                        | 2371.9 (-10.4%)  | 1327.6 (-24.0%) | 997.8 (+20.9%)   |
| 8    | Pre-RE:  | 11.0                                | 4.3                             | 6.4                                 | 983.5            | 360.4           | 549.2            |
|      | Post-RE: | 10.6 (-3.1%)                        | 3.8 (-10.7%)                    | 6.5 (+2.4%)                         | 1052.8 (+7.0%)   | 441.0 (+22.4%)  | 577.6 (+5.2%)    |
| 9    | Pre-RE:  | 6.5                                 | 3.2                             | 2.8                                 | 2212.3           | 1080.6          | 910.8            |
|      | Post-RE: | 5.6 (-8.1%)                         | 1.1 (-67.4%)                    | 4.7 (+65.8%)                        | 2042.2 (-7.7%)   | 634.7 (-41.3%)  | 1255.4 (+37.8%)  |
| 10   | Pre-RE:  | 8.7                                 | 7.2                             | 1.2                                 | 1963.6           | 1560.2          | 337.9            |
|      | Post-RE: | 5.1 (-40.8%)                        | 1.5 (-79.5%)                    | 3.6 (+190.9%)                       | 1880.0 (-4.3%)   | 920.8 (-41.0%)  | 938.1 (+177.6%)  |
| 11   | Pre-RE:  | 6.3                                 | 5.4                             | 0.8                                 | 2015.7           | 1650.3          | 326.7            |
|      | Post-RE: | 4.9 (-23.3%)                        | 2.9 (-45.6%)                    | 1.9 (+130.7%)                       | 1861.1 (-7.7%)   | 1281.5 (-22.3%) | 563.8 (+72.6%)   |
| 12   | Pre-RE:  | 7.3                                 | 6.5                             | 0.7                                 | 1120.3           | 1009.5          | 107.2            |
|      | Post-RE: | 5.7 (-21.3%)                        | 2.7 (-58.1%)                    | 3.0 (+312.8%)                       | 1437.3 (+28.3%)  | 997.6 (-1.2%)   | 435.1 (+305.9%)  |
| 13   | Pre-RE:  | 6.2                                 | 4.1                             | 1.8                                 | 1252.5           | 791.1           | 326.5            |
|      | Post-RE: | 6.0 (-4.5%)                         | 1.9 (-54.7%)                    | 3.9 (+118.4%)                       | 1234.4 (-1.4%)   | 633.7 (-19.9%)  | 507.7 (+55.5%)   |
